# Supplementary material for: How does the combination of the nitro group and fluorine atoms affect the (co)crystallization behaviour of arylenediamines?
Source: Royal Society of Chemistry journal article supplement (doi:10.1039/d3ce00327b), 2023-01-01
Supplement: d3ce00327b1.pdf [file d3ce00327b1.pdf]

*Electronic Supplementary Information*

**How does the combination of the nitro group and fluorine atoms affect the (co)crystallization behaviour of arylenediamines?**

Tamara A. Vaganova,<sup>a</sup> Yuriy V. Gatilov,<sup>a</sup> Natalia A. Kryuchkova,<sup>b</sup>  
Denis P. Pishchur,<sup>b</sup> Anastasia A. Zhukovets,<sup>a</sup> and Evgenij V. Malykhin\*<sup>a</sup>

---

<sup>a</sup> N.N. Vorozhtsov Novosibirsk Institute of Organic Chemistry, Siberian Branch of the Russian Academy of Sciences, 9 Lavrentiev Avenue, 630090 Novosibirsk, Russian Federation. E-mail: [malykhin@nioch.nsc.ru](mailto:malykhin@nioch.nsc.ru)

<sup>b</sup> Nikolaev Institute of Inorganic Chemistry, Siberian Branch of the Russian Academy of Sciences, 3 Lavrentiev Avenue, 630090 Novosibirsk, Russian Federation.

**Table S1** Crystallographic data and structure refinement parameters

|                                                                                                                   | <b>A•cr</b>                                                                  | <b>A<sub>2</sub>•cr</b>                                                       | <b>B•cr</b>                                                                  | <b>B<sub>2</sub>•cr</b>                                                       | <b>C•cr</b>                                                            |
|-------------------------------------------------------------------------------------------------------------------|------------------------------------------------------------------------------|-------------------------------------------------------------------------------|------------------------------------------------------------------------------|-------------------------------------------------------------------------------|------------------------------------------------------------------------|
| CCDC number                                                                                                       | 2253808                                                                      | 2253806                                                                       | 2253809                                                                      | 2253807                                                                       | 2253810                                                                |
| Crystal data                                                                                                      |                                                                              |                                                                               |                                                                              |                                                                               |                                                                        |
| Chemical formula                                                                                                  | C <sub>18</sub> H <sub>28</sub> F <sub>3</sub> N <sub>3</sub> O <sub>8</sub> | C <sub>24</sub> H <sub>32</sub> F <sub>6</sub> N <sub>6</sub> O <sub>10</sub> | C <sub>18</sub> H <sub>29</sub> F <sub>2</sub> N <sub>3</sub> O <sub>8</sub> | C <sub>24</sub> H <sub>34</sub> F <sub>4</sub> N <sub>6</sub> O <sub>10</sub> | C <sub>18</sub> H <sub>30</sub> FN <sub>3</sub> O <sub>8</sub>         |
| <i>M<sub>r</sub></i>                                                                                              | 471.43                                                                       | 678.55                                                                        | 453.44                                                                       | 642.57                                                                        | 435.45                                                                 |
| Crystal system, space group                                                                                       | Triclinic, <i>P</i> <sup>-</sup> 1                                           | Triclinic, <i>P</i> <sup>-</sup> 1                                            | Triclinic, <i>P</i> <sup>-</sup> 1                                           | Triclinic, <i>P</i> <sup>-</sup> 1                                            | Monoclinic, <i>Cc</i>                                                  |
| Temperature (K)                                                                                                   | 296                                                                          | 296                                                                           | 296                                                                          | 170                                                                           | 296                                                                    |
| <i>a</i> , <i>b</i> , <i>c</i> (Å)                                                                                | 8.0036 (7),<br>9.2934 (7),<br>15.7077 (12)                                   | 11.6265 (4),<br>11.6941 (6),<br>12.1146 (6)                                   | 7.9046 (8),<br>9.2505 (8),<br>15.7606 (16)                                   | 11.4494 (6),<br>11.7343 (6),<br>12.2027 (6)                                   | 14.0576 (5),<br>11.0469 (3),<br>15.0431 (6)                            |
| $\alpha$ , $\beta$ , $\gamma$ (°)                                                                                 | 80.801 (4),<br>81.339 (4),<br>78.770 (4)                                     | 73.313 (2),<br>77.928 (1),<br>80.047 (1)                                      | 79.769 (3),<br>84.623 (3),<br>78.313 (4)                                     | 73.603 (2),<br>77.788 (2),<br>79.850 (2)                                      | 90,<br>111.343 (2),<br>90                                              |
| <i>V</i> (Å <sup>3</sup> )                                                                                        | 1122.60 (16)                                                                 | 1531.64 (12)                                                                  | 1108.61 (19)                                                                 | 1525.26 (14)                                                                  | 2175.87 (13)                                                           |
| <i>Z</i>                                                                                                          | 2                                                                            | 2                                                                             | 2                                                                            | 2                                                                             | 4                                                                      |
| Radiation type                                                                                                    | Mo <i>K</i> α                                                                | Mo <i>K</i> α                                                                 | Mo <i>K</i> α                                                                | Mo <i>K</i> α                                                                 | Mo <i>K</i> α                                                          |
| $\mu$ (mm <sup>-1</sup> )                                                                                         | 0.12                                                                         | 0.14                                                                          | 0.12                                                                         | 0.12                                                                          | 0.11                                                                   |
| Crystal size (mm)                                                                                                 | 0.36 × 0.34 × 0.16                                                           | 0.62 × 0.26 × 0.10                                                            | 0.68 × 0.38 × 0.23                                                           | 0.51 × 0.14 × 0.07                                                            | 0.64 × 0.23 × 0.17                                                     |
| Data collection                                                                                                   |                                                                              |                                                                               |                                                                              |                                                                               |                                                                        |
| Diffractometer                                                                                                    | Bruker APEX-II                                                               | Bruker APEX-II                                                                | Bruker APEX-II                                                               | Bruker APEX-II                                                                | Bruker APEX-II                                                         |
| Absorption correction                                                                                             | SADABS-2008/1                                                                | SADABS-2008/1                                                                 | SADABS-2008/1                                                                | SADABS-2008/1                                                                 | SADABS-2008/1                                                          |
| No. of measured, independent and observed reflections                                                             | 30056, 5213,<br>3990<br>[ <i>I</i> > 2σ( <i>I</i> )]                         | 41112, 6787,<br>4918<br>[ <i>I</i> > 2σ( <i>I</i> )]                          | 29238, 4929,<br>3734<br>[ <i>I</i> > 2σ( <i>I</i> )]                         | 36075, 6654,<br>4559<br>[ <i>I</i> > 2σ( <i>I</i> )]                          | 20815, 4900,<br>4074<br>[ <i>I</i> > 2σ( <i>I</i> )]                   |
| <i>R</i> <sub>int</sub>                                                                                           | 0.046                                                                        | 0.035                                                                         | 0.056                                                                        | 0.051                                                                         | 0.040                                                                  |
| (sin θ/λ) <sub>max</sub> (Å <sup>-1</sup> )                                                                       | 0.653                                                                        | 0.643                                                                         | 0.644                                                                        | 0.640                                                                         | 0.660                                                                  |
| Refinement                                                                                                        |                                                                              |                                                                               |                                                                              |                                                                               |                                                                        |
| <i>R</i> [ <i>F</i> <sup>2</sup> > 2σ( <i>F</i> <sup>2</sup> )],<br><i>wR</i> ( <i>F</i> <sup>2</sup> ), <i>S</i> | 0.094, 0.332,<br>1.01                                                        | 0.044, 0.145,<br>1.01                                                         | 0.064, 0.199,<br>1.03                                                        | 0.041, 0.135,<br>0.97                                                         | 0.035, 0.087, 1.01                                                     |
| No. of reflections                                                                                                | 5213                                                                         | 6787                                                                          | 4929                                                                         | 6654                                                                          | 4900                                                                   |
| No. of parameters                                                                                                 | 302                                                                          | 431                                                                           | 296                                                                          | 429                                                                           | 287                                                                    |
| No. of restraints                                                                                                 | 4                                                                            | 4                                                                             | 4                                                                            | 8                                                                             | 6                                                                      |
| H-atom treatment                                                                                                  | H atoms treated by a mixture of independent and constrained refinement       | H atoms treated by a mixture of independent and constrained refinement        | H atoms treated by a mixture of independent and constrained refinement       | H atoms treated by a mixture of independent and constrained refinement        | H atoms treated by a mixture of independent and constrained refinement |
| $\Delta\rho_{\max}$ , $\Delta\rho_{\min}$ (e Å <sup>-3</sup> )                                                    | 0.43, -0.36                                                                  | 0.85, -0.32                                                                   | 0.46, -0.36                                                                  | 0.60, -0.16                                                                   | 0.13, -0.17                                                            |
| Absolute structure parameter                                                                                      | –                                                                            | –                                                                             | –                                                                            | –                                                                             | 0.7 (3)                                                                |

**Table S1** Crystallographic data and structure refinement parameters (continued)

|                                                                                                                | D•cr                                                                   | A                                                                          | B                                                                          | C                                                                      |
|----------------------------------------------------------------------------------------------------------------|------------------------------------------------------------------------|----------------------------------------------------------------------------|----------------------------------------------------------------------------|------------------------------------------------------------------------|
| CCDC number                                                                                                    | 2253811                                                                | 2253812                                                                    | 2253813                                                                    | 2253814                                                                |
| Crystal data                                                                                                   |                                                                        |                                                                            |                                                                            |                                                                        |
| Chemical formula                                                                                               | C <sub>18</sub> H <sub>31</sub> N <sub>3</sub> O <sub>8</sub>          | C <sub>6</sub> H <sub>4</sub> F <sub>3</sub> N <sub>3</sub> O <sub>2</sub> | C <sub>6</sub> H <sub>5</sub> F <sub>2</sub> N <sub>3</sub> O <sub>2</sub> | C <sub>6</sub> H <sub>6</sub> FN <sub>3</sub> O <sub>2</sub>           |
| <i>M<sub>r</sub></i>                                                                                           | 417.46                                                                 | 207.12                                                                     | 189.13                                                                     | 171.14                                                                 |
| Crystal system, space group                                                                                    | Monoclinic, <i>Cc</i>                                                  | Orthorhombic, <i>Pna2<sub>1</sub></i>                                      | Monoclinic, <i>Pc</i>                                                      | Monoclinic, <i>P2<sub>1</sub>/n</i>                                    |
| Temperature (K)                                                                                                | 296                                                                    | 296                                                                        | 296                                                                        | 296                                                                    |
| <i>a</i> , <i>b</i> , <i>c</i> (Å)                                                                             | 13.7751 (10), 11.1808 (6), 14.7876 (11)                                | 7.1452 (4), 13.5660 (8), 7.7555 (5)                                        | 7.6215 (4), 3.6750 (2), 13.2829 (7)                                        | 4.5277 (2), 11.3347 (6), 13.8350 (7)                                   |
| $\alpha$ , $\beta$ , $\gamma$ (°)                                                                              | 90, 109.477 (3), 90                                                    | 90, 90, 90                                                                 | 90, 104.936 (2), 90                                                        | 90, 93.8990 (17), 90                                                   |
| <i>V</i> (Å <sup>3</sup> )                                                                                     | 2147.2 (3)                                                             | 751.75 (8)                                                                 | 359.47 (3)                                                                 | 708.37 (6)                                                             |
| <i>Z</i>                                                                                                       | 4                                                                      | 4                                                                          | 2                                                                          | 4                                                                      |
| Radiation type                                                                                                 | Mo <i>K</i> α                                                          | Mo <i>K</i> α                                                              | Mo <i>K</i> α                                                              | Mo <i>K</i> α                                                          |
| $\mu$ (mm <sup>-1</sup> )                                                                                      | 0.10                                                                   | 0.19                                                                       | 0.17                                                                       | 0.14                                                                   |
| Crystal size (mm)                                                                                              | 0.64 × 0.28 × 0.24                                                     | 0.54 × 0.19 × 0.12                                                         | 0.42 × 0.27 × 0.19                                                         | 0.49 × 0.43 × 0.14                                                     |
| Data collection                                                                                                |                                                                        |                                                                            |                                                                            |                                                                        |
| Diffractometer                                                                                                 | Bruker APEX-II                                                         | Bruker APEX-II                                                             | Bruker APEX-II                                                             | Bruker APEX-II                                                         |
| Absorption correction                                                                                          | SADABS-2008/1                                                          | SADABS-2008/1                                                              | SADABS-2008/1                                                              | SADABS-2008/1                                                          |
| No. of measured, independent and observed reflections                                                          | 5827, 3403, 3035 [ <i>I</i> > 2σ( <i>I</i> )]                          | 13714, 1823, 1521 [ <i>I</i> > 2σ( <i>I</i> )]                             | 4750, 1592, 1487 [ <i>I</i> > 2σ( <i>I</i> )]                              | 7480, 1571, 1337 [ <i>I</i> > 2σ( <i>I</i> )]                          |
| <i>R</i> <sub>int</sub>                                                                                        | 0.047                                                                  | 0.031                                                                      | 0.017                                                                      | 0.049                                                                  |
| (sin θ/λ) <sub>max</sub> (Å <sup>-1</sup> )                                                                    | 0.650                                                                  | 0.662                                                                      | 0.642                                                                      | 0.643                                                                  |
| Refinement                                                                                                     |                                                                        |                                                                            |                                                                            |                                                                        |
| <i>R</i> [ <i>F</i> <sup>2</sup> > 2σ( <i>F</i> <sup>2</sup> )], <i>wR</i> ( <i>F</i> <sup>2</sup> ), <i>S</i> | 0.040, 0.115, 0.99                                                     | 0.033, 0.105, 1.05                                                         | 0.026, 0.079, 1.03                                                         | 0.041, 0.123, 1.05                                                     |
| No. of reflections                                                                                             | 3403                                                                   | 1823                                                                       | 1592                                                                       | 1571                                                                   |
| No. of parameters                                                                                              | 278                                                                    | 143                                                                        | 134                                                                        | 125                                                                    |
| No. of restraints                                                                                              | 6                                                                      | 1                                                                          | 2                                                                          | 4                                                                      |
| H-atom treatment                                                                                               | H atoms treated by a mixture of independent and constrained refinement | All H-atom parameters refined                                              | H atoms treated by a mixture of independent and constrained refinement     | H atoms treated by a mixture of independent and constrained refinement |
| $\Delta\rho_{\max}$ , $\Delta\rho_{\min}$ (e Å <sup>-3</sup> )                                                 | 0.22, -0.19                                                            | 0.24, -0.16                                                                | 0.17, -0.15                                                                | 0.32, -0.24                                                            |
| Absolute structure parameter                                                                                   | -0.7 (9)                                                               | 0.1 (2)                                                                    | -0.4 (2)                                                                   | –                                                                      |

Computer programs: *SHELXT* 2014/5 (Sheldrick, 2014), *SHELXL2018/3* (Sheldrick, 2018), *SADABS-2008/1*.

**Table S2** Hydrogen bonding in the co-crystals and homocrystals

| Sample code             | Interaction<br>D-H...A | $I_{D-H}$ (Å) | $I_{H...A}$ (Å) | $I_{D...A}$ (Å) | Angle<br>D-H...A (deg) | Symmetry code<br>for acceptor |
|-------------------------|------------------------|---------------|-----------------|-----------------|------------------------|-------------------------------|
| <b>A-cr</b>             | N(1)-H(1A)...O(6)      | 0.90(5)       | 2.34(5)         | 3.121(5)        | 145(4)                 | 1-x,1-y,-z                    |
|                         | N(1)-H(1A)...O(7)      | 0.90(5)       | 2.49(6)         | 3.052(7)        | 122(5)                 | 1-x,1-y,-z                    |
|                         | N(1)-H(1B)...O(6)      | 0.90(4)       | 2.31(4)         | 3.190(5)        | 165(5)                 |                               |
|                         | N(2)-H(2B)...O(3)      | 0.90(4)       | 2.30(4)         | 3.186(6)        | 168(4)                 | 1-x,1-y,1-z                   |
|                         | C(12)-H(12A)...F(2)    | 0.97          | 2.51            | 3.260(5)        | 134                    | 1-x,1-y,1-z                   |
| <b>A<sub>2</sub>-cr</b> | N(1)-H(1B)...O(4)      | 0.895(19)     | 2.34(2)         | 3.215(3)        | 166(2)                 | 1-x,2-y,-z                    |
|                         | N(2)-H(2A)...O(7)      | 0.882(19)     | 2.208(19)       | 3.055(2)        | 161(2)                 |                               |
|                         | N(2)-H(2B)...O(9)      | 0.89(2)       | 2.222(19)       | 3.082(2)        | 164(2)                 |                               |
|                         | N(4)-H(4B)...O(1)      | 0.86          | 2.44            | 3.124(3)        | 136                    | -x,2-y,-z                     |
|                         | N(5)-H(5A)...O(10)     | 0.86          | 2.28            | 3.096(2)        | 159                    |                               |
|                         | N(5)-H(5B)...O(8)      | 0.86          | 2.29            | 3.129(2)        | 166                    |                               |
|                         | C(15)-H(15B)...F(1)    | 0.97          | 2.52            | 3.279(3)        | 135                    |                               |
|                         | C(16)-H(16A)...O(1)    | 0.97          | 2.52            | 3.462(3)        | 165                    | 1+x,y,z                       |
|                         | C(23)-H(23A)...O(3)    | 0.97          | 2.52            | 3.492(3)        | 175                    | -1+x,y,z                      |
|                         | C(24)-H(24B)...F(4)    | 0.97          | 2.52            | 3.283(3)        | 136                    |                               |
| <b>B-cr</b>             | N(1)-H(1A)...O(3)      | 0.87(3)       | 2.42(3)         | 3.167(3)        | 144(2)                 |                               |
|                         | N(1)-H(1A)...O(5)      | 0.87(3)       | 2.50(3)         | 3.091(3)        | 126(3)                 | 1-x,1-y,2-z                   |
|                         | N(1)-H(1B)...O(3)      | 0.88(2)       | 2.30(2)         | 3.164(3)        | 167(2)                 | 1-x,1-y,2-z                   |
|                         | N(1)-H(1B)...O(4)      | 0.88(2)       | 2.59(2)         | 3.166(3)        | 123.6(18)              | 1-x,1-y,2-z                   |
|                         | N(2)-H(2A)...O(6)      | 0.87(3)       | 2.43(3)         | 3.267(3)        | 162(3)                 | 1-x,1-y,1-z                   |
|                         | C(13)-H(13A)...F(2)    | 0.97          | 2.49            | 3.260(3)        | 136                    |                               |
| <b>B<sub>2</sub>-cr</b> | N(1)-H(1B)...O(4)      | 0.888(19)     | 2.277(19)       | 3.138(3)        | 163.3(19)              | 1+x,y,z                       |
|                         | N(2)-H(2A)...O(10)     | 0.882(19)     | 2.243(19)       | 3.088(2)        | 160(2)                 |                               |
|                         | N(2)-H(2B)...O(8)      | 0.89(2)       | 2.252(19)       | 3.104(2)        | 162(2)                 |                               |
|                         | N(4)-H(4B)...O(1)      | 0.88(2)       | 2.35(2)         | 3.123(2)        | 146.4(19)              |                               |
|                         | N(5)-H(5A)...O(7)      | 0.88(2)       | 2.32(2)         | 3.130(2)        | 153(2)                 | 1-x,1-y,1-z                   |
|                         | N(5)-H(5B)...O(9)      | 0.865(19)     | 2.292(19)       | 3.125(2)        | 162(2)                 | 1-x,1-y,1-z                   |
|                         | C(15)-H(15B)...F(3)    | 0.99          | 2.50            | 3.269(3)        | 135                    | 1-x,1-y,1-z                   |
|                         | C(16)-H(16A)...O(3)    | 0.99          | 2.42            | 3.401(3)        | 174                    | -x,1-y,1-z                    |
|                         | C(23)-H(23A)...O(1)    | 0.99          | 2.45            | 3.399(3)        | 161                    | 1+x,y,z                       |
|                         | C(24)-H(24B)...F(1)    | 0.99          | 2.49            | 3.272(3)        | 135                    |                               |

**Table S2** Hydrogen bonding in the co-crystals and homocrystals (continued)

| Sample code          | Interaction<br>D-H...A | $I_{D-H}$ (Å) | $I_{H...A}$ (Å) | $I_{D...A}$ (Å) | Angle<br>D-H...A (deg) | Symmetry code for<br>acceptor |
|----------------------|------------------------|---------------|-----------------|-----------------|------------------------|-------------------------------|
| <b>C-cr</b>          | N(1)-H(1B)···O(5)      | 0.889(15)     | 2.340(16)       | 3.209(3)        | 166(3)                 |                               |
|                      | N(2)-H(2A)···O(8)      | 0.91(2)       | 2.23(2)         | 3.110(3)        | 164(4)                 | $x, -y, -1/2+z$               |
|                      | N(2)-H(2B)···O(6)      | 0.89(3)       | 2.35(3)         | 3.140(4)        | 148(3)                 | $x, -y, -1/2+z$               |
|                      | C(11)-H(11B)···F(1)    | 0.97          | 2.40            | 3.274(3)        | 149                    |                               |
|                      | C(17)-H(17A)···O(2)    | 0.99          | 2.42            | 3.297(4)        | 150                    | $x, -y, 1/2+z$                |
| <b>D-cr</b>          | N(1)-H(1B)···O(6)      | 0.87(2)       | 2.50(3)         | 3.335(3)        | 159(4)                 | $x, 1-y, -1/2+z$              |
|                      | N(2)-H(2A)···O(3)      | 0.90(3)       | 2.19(2)         | 3.081(3)        | 172(4)                 |                               |
|                      | N(2)-H(2B)···O(5)      | 0.88(3)       | 2.26(4)         | 3.091(4)        | 157(3)                 |                               |
|                      | C(18)-H(18A)···O(2)    | 0.97          | 2.46            | 3.344(4)        | 151                    | $x, 1-y, 1/2+z$               |
| <b>A</b>             | N(2)-H(2A)···F(3)      | 0.86(4)       | 2.55(4)         | 3.183(3)        | 132(4)                 | $3/2-x, 1/2+y, -1/2+z$        |
|                      | N(2)-H(2A)···O(2)      | 0.86(4)       | 2.29(4)         | 3.107(4)        | 159(3)                 | $3/2-x, 1/2+y, -1/2+z$        |
|                      | N(2)-H(2B)···O(1)      | 0.92(5)       | 2.10(5)         | 2.997(4)        | 166(4)                 | $1/2+x, 1/2-y, -1+z$          |
| <b>B</b>             | N(1)-H(1B)···O(1)      | 0.92(4)       | 2.17(4)         | 3.063(3)        | 164(3)                 | $x, -y, -1/2+z$               |
|                      | N(2)-H(2A)···O(2)      | 0.90(4)       | 2.35(4)         | 3.072(3)        | 138(4)                 | $-1+x, -y, -1/2+z$            |
|                      | N(2)-H(2B)···O(1)      | 0.87(5)       | 2.37(4)         | 3.014(3)        | 132(3)                 | $-1+x, 1-y, -1/2+z$           |
| <b>C</b>             | N(1)-H(1A)···N(2)      | 0.892(17)     | 2.513(18)       | 3.1829(18)      | 132.3(14)              | $3/2-x, -1/2+y, 3/2-z$        |
|                      | N(1)-H(1B)···O(1)      | 0.886(16)     | 2.277(16)       | 3.1380(17)      | 163.8(17)              | $1/2+x, 1/2-y, 1/2+z$         |
|                      | N(2)-H(2A)···O(2)      | 0.890(17)     | 2.285(17)       | 3.1658(17)      | 170.6(17)              | $-1/2+x, 1/2-y, 1/2+z$        |
|                      | N(2)-H(2B)···N(1)      | 0.885(19)     | 2.400(19)       | 3.2730(19)      | 169.2(16)              | $1/2-x, 1/2+y, 3/2-z$         |
|                      | C(3)-H(3)···O(1)       | 0.93          | 2.59            | 3.3635(18)      | 141                    | $1/2+x, 1/2-y, 1/2+z$         |
|                      | C(6)-H(6)···F(1)       | 0.93          | 2.48            | 3.4013(16)      | 169                    | $-x, 1-y, 1-z$                |
| <b>D<sup>a</sup></b> | N(1)-H(11)···N(3)      | 0.86          | 2.41            | 3.2595(18)      | 171                    | $-1/2-x, 1/2+y, 1/2-z$        |
|                      | N(1)-H(12)···O(1)      | 0.86          | 2.25            | 3.0210(17)      | 149                    | $-1/2+x, 3/2-y, 1/2+z$        |
|                      | N(3)-H(31)···O(2)      | 0.86          | 2.16            | 2.9641(16)      | 155                    | $1/2+x, 3/2-y, 1/2+z$         |
|                      | N(3)-H(32)···N(1)      | 0.86          | 1.62            | 3.2811(1)       | 135                    | $1/2-x, -1/2+y, 1/2-z$        |
|                      | C(2)-H(2)···O(2)       | 0.93          | 2.55            | 3.3205(19)      | 140                    | $1/2+x, 3/2-y, 1/2+z$         |

<sup>a</sup> Data from the work C. Glidewell, D. Cannon, A. Quesada, J. N. Low, S. A. McWilliam, J. M. S. Skakle, J. L. Wardell, *Acta Crystallogr., Sect. C: Cryst. Struct. Commun.*, 2001, **C57**, 455-458; CCDC **163928**.

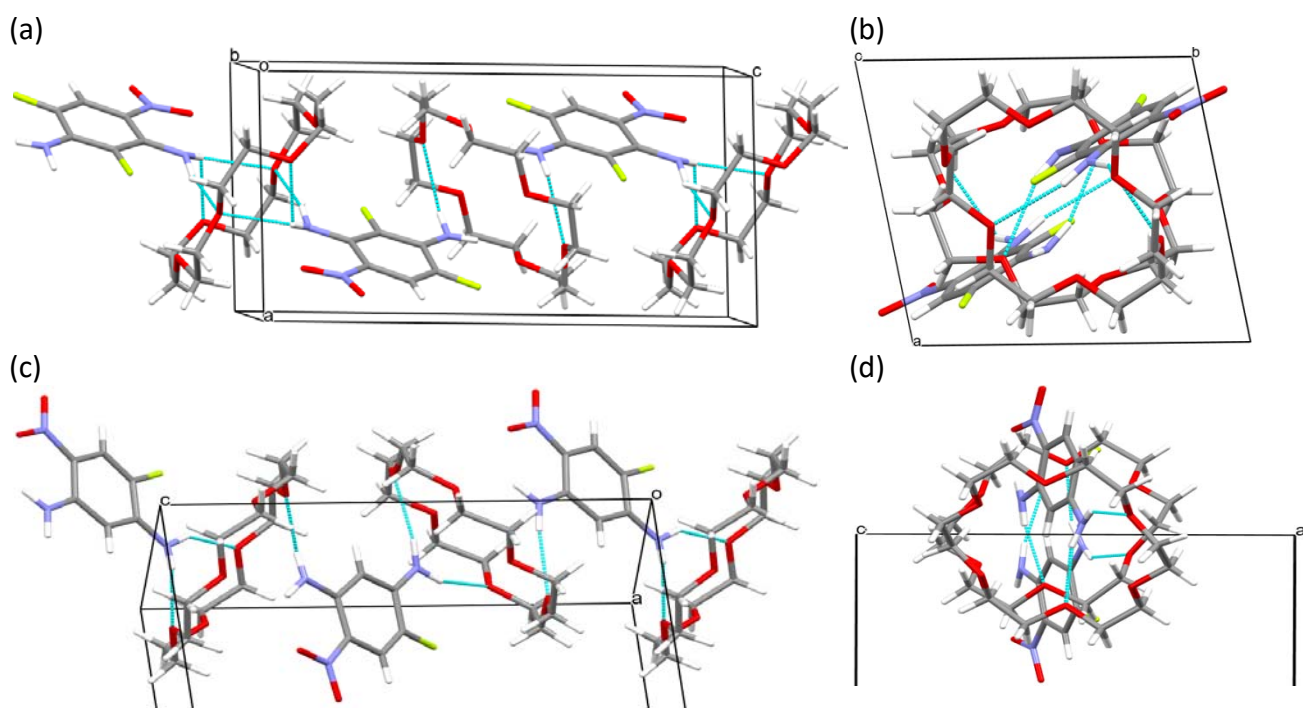

**Fig. S1** 1D assembly in the co-crystals, top and cross-section view: B-cr (a, b), C-cr (c, d).

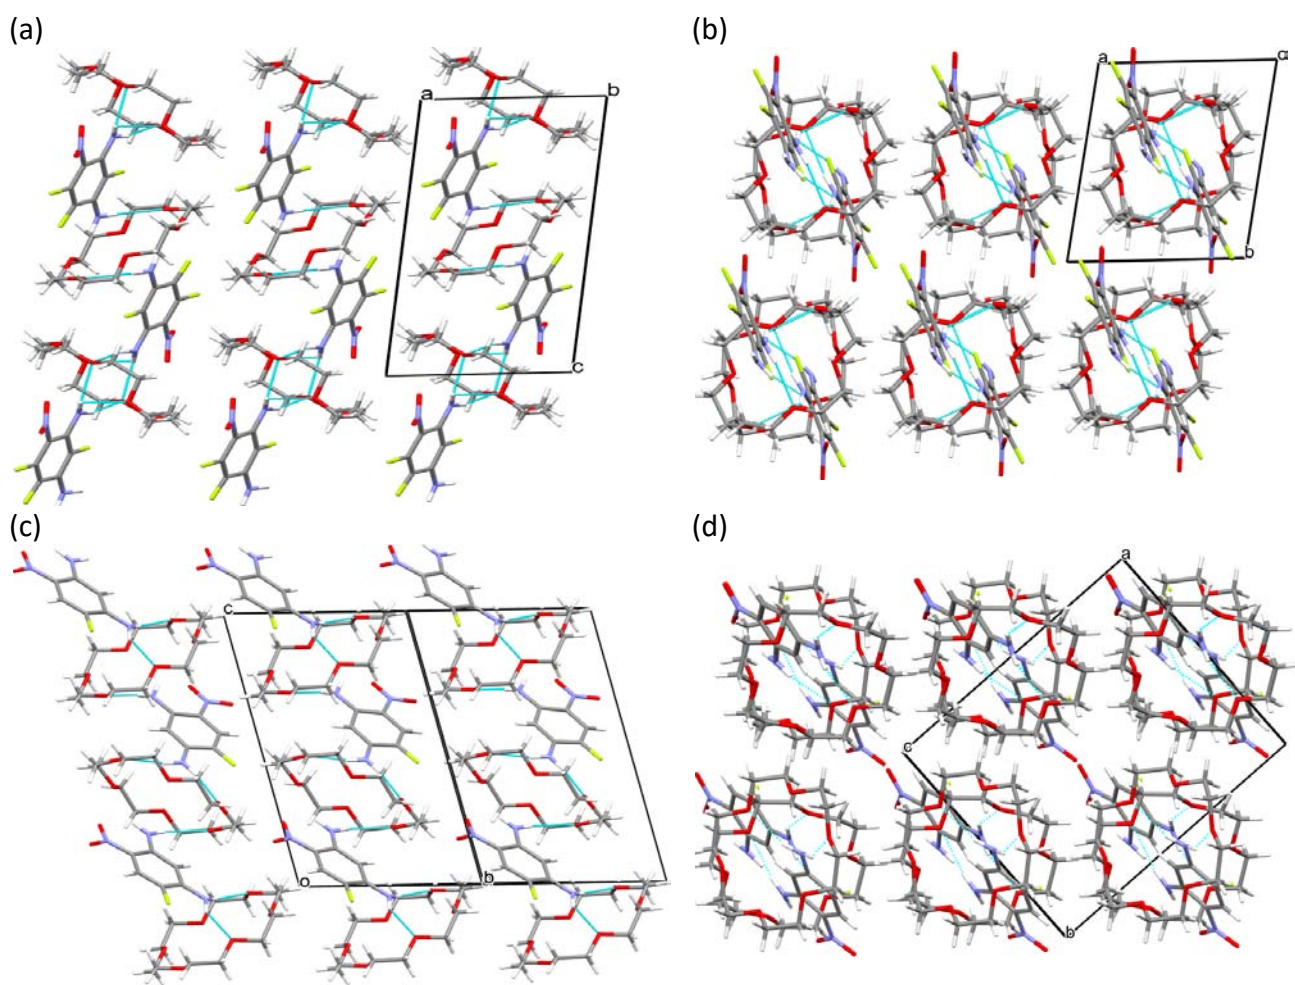

**Fig. S2** Packing of the rods in co-crystals, top view on the layer and cross-section view: A-cr (a, b), C-cr (c, d).

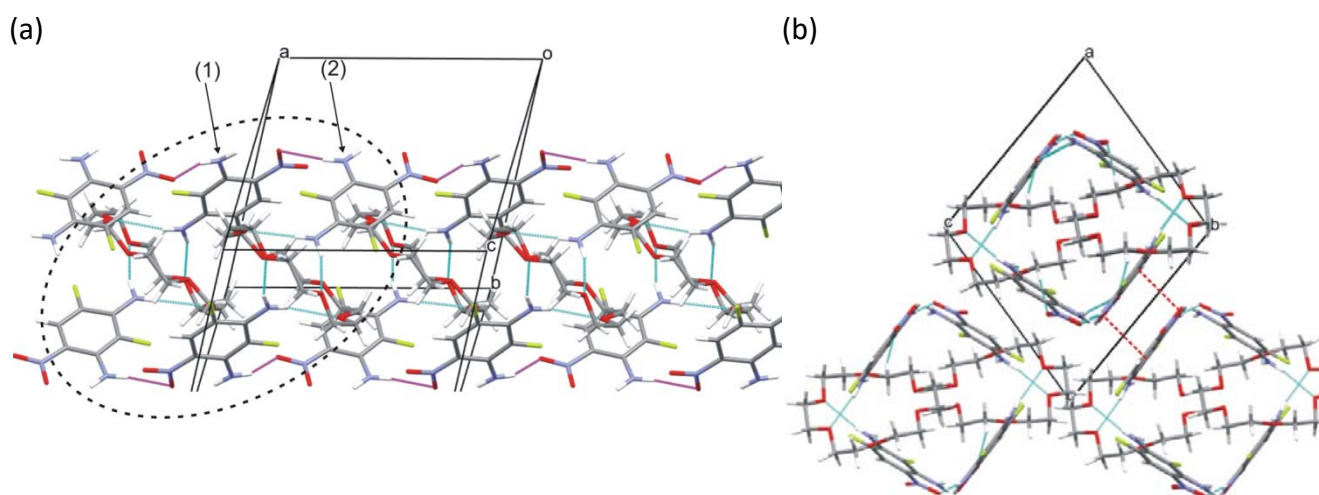

**Fig. S3** Crystal packing in  $B_2 \cdot cr$ : H-bonded 1D assembly (a):  $N-H \cdots O_{cr}$  (turquoise),  $N-H \cdots O_{nitro}$  (magenta), unit (6 molecules) is framed;  $p \cdots \pi$  interactions between assemblies (b).

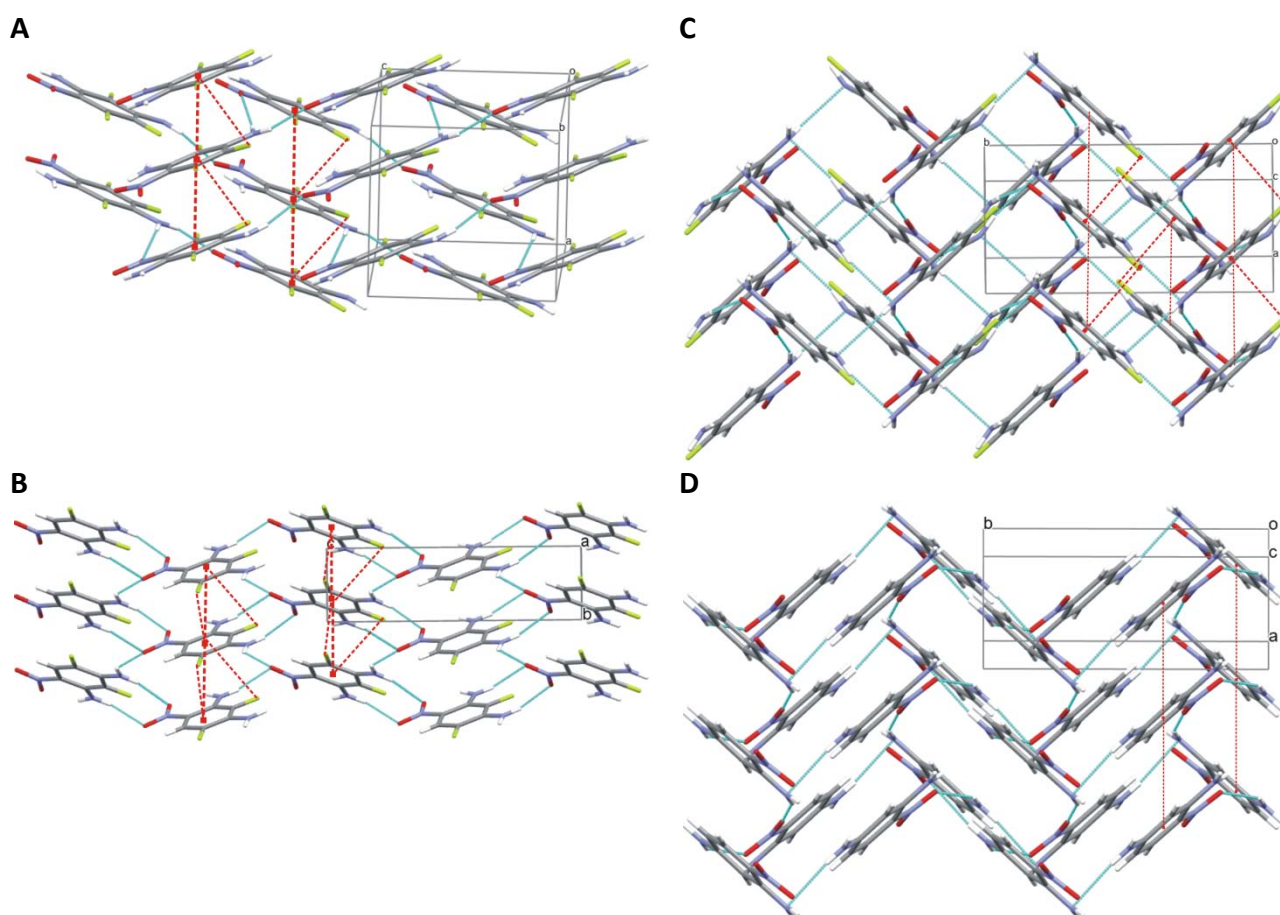

**Fig. S4** Molecular packing of diaminonitrobenzenes **A – D** in the crystals, side view on the  $p \cdots \pi$  electron bonded stacks.

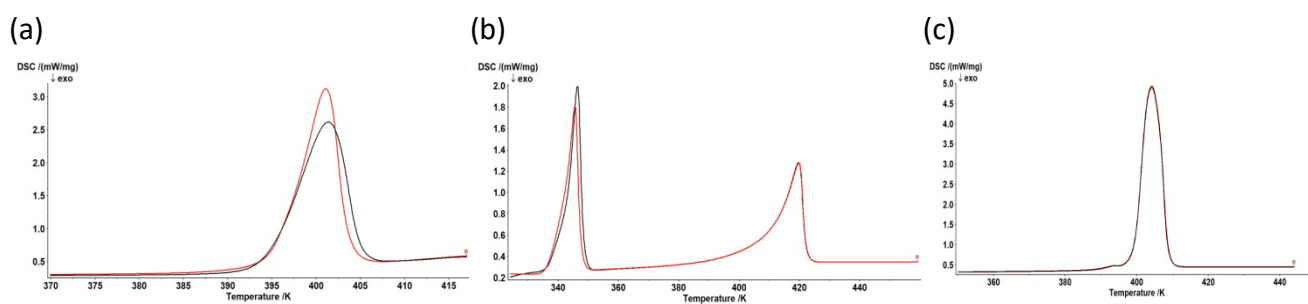

**Fig. S5** DSC curves of the co-crystals, the first (black) and second (red) heating runs: **B<sub>2</sub>-cr** (a); **A-cr** (b); **D-cr** (c).

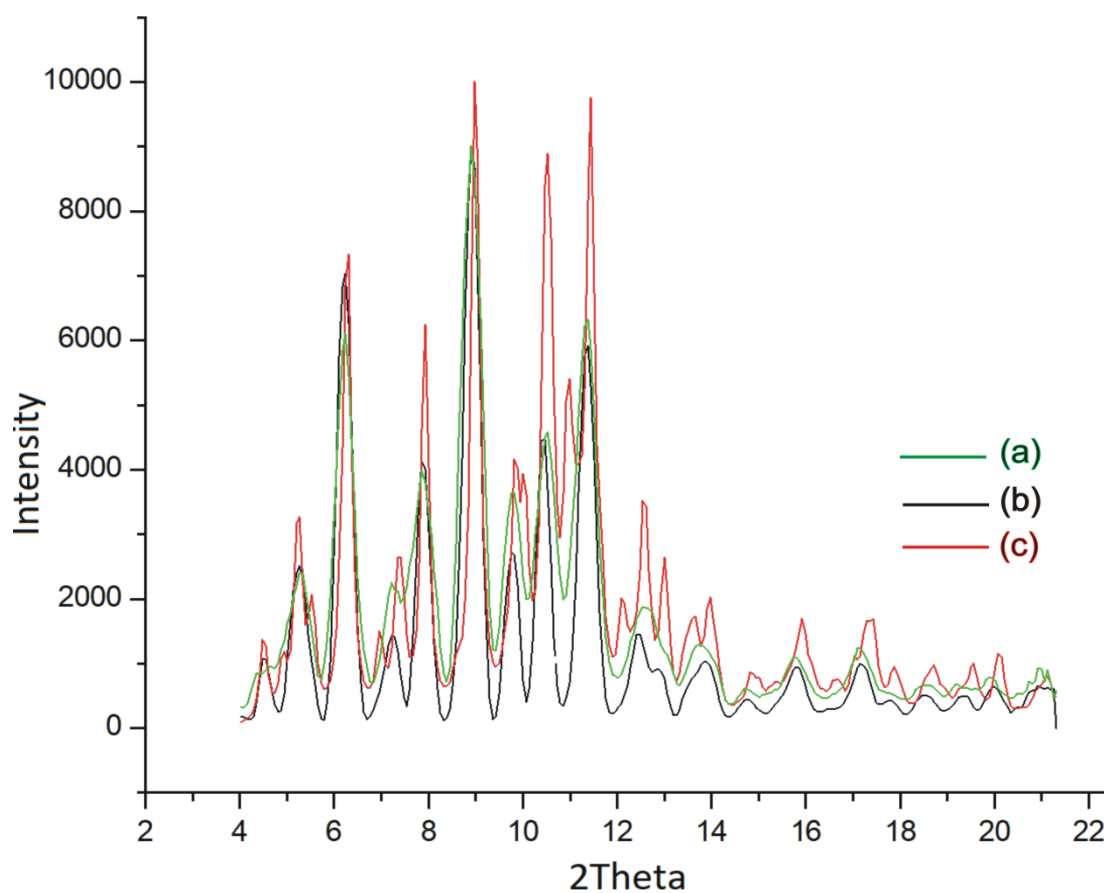

**Fig. S6** PXRD patterns of **A-cr**: bulky precipitate crystallized from *t*-BuOMe (experimental, a), crystallized from the melt (experimental, b), simulated from SC-XRD data using MERCURY software with peak shape 0.3 (calculated, c).



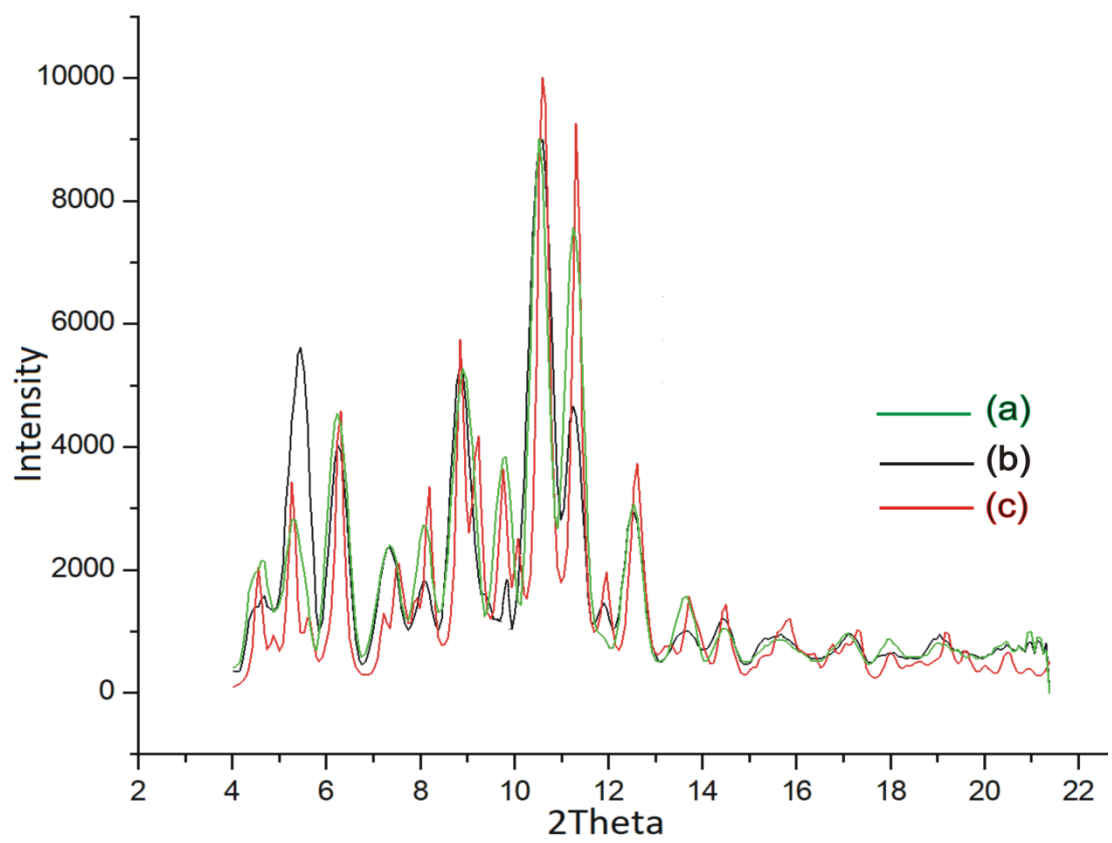

**Fig. S7** PXRd patterns of **B-cr**: bulky precipitate crystallized from *t*-BuOMe (experimental, a), crystallized from the melt (experimental, b), simulated from SC-XRD data using MERCURY software with peak shape 0.3 (calculated, c).

**Table S3** Enthalpies of co-crystals, homocrystals, and isolated molecules. Level of theory: DFT/GGA-PBE/ USPP in QUANTUM ESPRESSO

| Code                    | Final enthalpy (Ry) | Z | H/Z (Ry) <sup>a</sup> | $H(Y_x \cdot cr_{1-x})^b$ (Ry) |
|-------------------------|---------------------|---|-----------------------|--------------------------------|
| 1:1 co-crystals         |                     |   |                       |                                |
| <b>A·cr</b>             | -1407,99039845      | 2 | -703,99519922         | -351,99759961                  |
| <b>B·cr</b>             | -1313,20407953      | 2 | -656,60203976         | -328,30101988                  |
| <b>C·cr</b>             | -2436,81011652      | 4 | -609,20252913         | -304,60126456                  |
| <b>D·cr</b>             | -2247,12475905      | 4 | -561,78118976         | -280,89059488                  |
| 2:1 co-crystals         |                     |   |                       |                                |
| <b>A<sub>2</sub>·cr</b> | -2096,52758610      | 2 | -1048,26379305        | -349,42126435                  |
| <b>B<sub>2</sub>·cr</b> | -1906,96370388      | 2 | -953,48185194         | -317,82728398                  |
| Homocrystals            |                     |   |                       |                                |
| <b>A</b>                | -1376,96147914      | 4 | -344,24036978         | -344,24036978                  |
| <b>B</b>                | -593,70367933       | 2 | -296,85183967         | -296,85183967                  |
| <b>C</b>                | -997,77559239       | 4 | -249,44389810         | -249,44389810                  |
| <b>D</b>                | -808,06295742       | 4 | -202,01573936         | -202,01573936                  |
| <b>cr</b>               | -1438,90959346      | 4 | -359,72739836         | -359,72739836                  |
| Isolated molecules      |                     |   |                       |                                |
| <b>A</b>                | -344,21390406       |   |                       |                                |
| <b>B</b>                | -296,82691698       |   |                       |                                |
| <b>C</b>                | -249,40658711       |   |                       |                                |
| <b>D</b>                | -201,98518814       |   |                       |                                |
| <b>cr</b>               | -359,73061909       |   |                       |                                |

<sup>a</sup> Z is the number of molecules in a cell.

<sup>b</sup>  $H(Y_x \cdot cr_{1-x})$  is the enthalpy of a co-crystal normalized per unit, where Y – diamine, x – molar fraction of the diamine in the co-crystal (1/2 in 1:1 co-crystals and 2/3 in 2:1 co-crystals).

**Table S4** Energies of individual molecules, H-bonded and p $\cdots$  $\pi$  dimers in co-crystals and homocrystals.<sup>a</sup> Level of theory: DFT/B3LYP/ M6-31G (TM)+\*

| Crystal                                  | Molecule/dimer                                                | $E$ (Ha)      | $E$ (kJ mol <sup>-1</sup> ) |
|------------------------------------------|---------------------------------------------------------------|---------------|-----------------------------|
| 1:1 co-crystals                          |                                                               |               |                             |
| <b>A<math>\cdot</math>cr</b>             | A                                                             | -845,1848988  | -2218441,322                |
|                                          | cr1                                                           | -923,0044119  | -2422701,980                |
|                                          | cr2                                                           | -923,0088610  | -2422713,658                |
|                                          | A $\cdots$ cr1 ( <i>ortho</i> -N-H $\cdots$ O <sub>cr</sub> ) | -1768,2057666 | -4641186,496                |
|                                          | A $\cdots$ cr2 ( <i>para</i> -N-H $\cdots$ O <sub>cr</sub> )  | -1768,2135690 | -4641206,976                |
| <b>B<math>\cdot</math>cr</b>             | B                                                             | -745,9656389  | -1958010,609                |
|                                          | cr1                                                           | -923,0038250  | -2422700,440                |
|                                          | cr2                                                           | -923,0088048  | -2422713,511                |
|                                          | B $\cdots$ cr1 ( <i>ortho</i> -N-H $\cdots$ O <sub>cr</sub> ) | -1668,9847970 | -4380751,295                |
|                                          | B $\cdots$ cr2 ( <i>para</i> -N-H $\cdots$ O <sub>cr</sub> )  | -1668,9924264 | -4380771,321                |
| <b>C<math>\cdot</math>cr</b>             | C                                                             | -646,7286414  | -1697533,338                |
|                                          | cr                                                            | -923,0101844  | -2422717,132                |
|                                          | C $\cdots$ cr ( <i>ortho</i> -N-H $\cdots$ O <sub>cr</sub> )  | -1569,7534317 | -4120288,808                |
|                                          | C $\cdots$ cr ( <i>para</i> -N-H $\cdots$ O <sub>cr</sub> )   | -1569,7595820 | -4120304,951                |
| <b>D<math>\cdot</math>cr</b>             | D                                                             | -547,4910547  | -1437054,520                |
|                                          | cr                                                            | -923,0107357  | -2422718,579                |
|                                          | D $\cdots$ cr ( <i>ortho</i> -N-H $\cdots$ O <sub>cr</sub> )  | -1470,5152328 | -3859808,383                |
|                                          | D $\cdots$ cr ( <i>para</i> -N-H $\cdots$ O <sub>cr</sub> )   | -1470,5206950 | -3859822,720                |
| 2:1 co-crystals                          |                                                               |               |                             |
| <b>A<sub>2</sub><math>\cdot</math>cr</b> | A1                                                            | -845,1853395  | -2218442,479                |
|                                          | A2                                                            | -845,1855136  | -2218442,936                |
|                                          | cr                                                            | -923,0094343  | -2422715,163                |
|                                          | A1 $\cdots$ cr ( <i>para</i> -N-H $\cdots$ O <sub>cr</sub> )  | -1768,2175976 | -4641217,550                |
|                                          | A2 $\cdots$ cr ( <i>para</i> -N-H $\cdots$ O <sub>cr</sub> )  | -1768,2173117 | -4641216,800                |
|                                          | A1...A2 ( <i>ortho</i> -N-H $\cdots$ O <sub>nitro</sub> )     | -1690,3771100 | -4436901,838                |
|                                          | A2...A1 ( <i>ortho</i> -N-H $\cdots$ O <sub>nitro</sub> )     | -1690,3777999 | -4436903,649                |
|                                          | A1...A1 (N-O $\cdots$ $\pi$ )                                 | -1690,3732623 | -4436891,739                |
|                                          | A2...A2 (C-F $\cdots$ $\pi$ )                                 | -1690,3760518 | -4436899,061                |
| <b>B<sub>2</sub><math>\cdot</math>cr</b> | B1                                                            | -745,9658098  | -1958011,058                |
|                                          | B2                                                            | -745,9660216  | -1958011,614                |
|                                          | cr                                                            | -923,0098700  | -2422716,307                |
|                                          | B1 $\cdots$ cr ( <i>para</i> -N-H $\cdots$ O <sub>cr</sub> )  | -1668,9964419 | -4380781,861                |
|                                          | B2 $\cdots$ cr ( <i>para</i> -N-H $\cdots$ O <sub>cr</sub> )  | -1668,9966955 | -4380782,526                |
|                                          | B1...B2 ( <i>ortho</i> -N-H $\cdots$ O <sub>nitro</sub> )     | -1491,9384600 | -3916040,070                |
|                                          | B2...B1 ( <i>ortho</i> -N-H $\cdots$ O <sub>nitro</sub> )     | -1491,9381708 | -3916039,311                |
|                                          | B1...B1 (N-O $\cdots$ $\pi$ )                                 | -1491,9316240 | -3916022,127                |

<sup>a</sup> Intermolecular interaction energies  $\Delta E$  (Table 6) were calculated by subtracting the energy of the two molecules from the dimer energy.

**Table S4** Energies of individual molecules, H-bonded and  $p \cdots \pi$  dimers in co-crystals and homocrystals.<sup>a</sup> Level of theory: DFT/B3LYP/ M6-31G (TM)+\* (continued)

| Crystal      | Molecule/dimer                                | $E$ (Ha)      | $E$ (kJ mol <sup>-1</sup> ) |
|--------------|-----------------------------------------------|---------------|-----------------------------|
| Homocrystals |                                               |               |                             |
| <b>A</b>     | A                                             | -845,1860657  | -2218444,385                |
|              | <i>para</i> -N-H $\cdots$ O <sub>nitro</sub>  | -1690,3844557 | -4436921,119                |
|              | <i>para</i> -N-H $\cdots$ F                   | -1690,3793020 | -4436907,592                |
|              | $\pi \cdots \pi$                              | -1690,3711746 | -4436886,259                |
| <b>B</b>     | B                                             | -745,9654640  | -1958010,150                |
|              | <i>ortho</i> -N-H $\cdots$ O <sub>nitro</sub> | -1491,9368756 | -3916035,911                |
|              | <i>para</i> -N-H $\cdots$ O <sub>nitro</sub>  | -1491,9386834 | -3916040,656                |
|              | <i>para</i> -N-H $\cdots$ O <sub>nitro</sub>  | -1491,9372784 | -3916036,968                |
|              | C-F $\cdots$ $\pi$                            | -1491,9231670 | -3915999,929                |
| <b>C</b>     | C                                             | -646,7284995  | -1697532,965                |
|              | <i>ortho</i> -N-H $\cdots$ O <sub>nitro</sub> | -1293,4632510 | -3395082,340                |
|              | <i>para</i> -N-H $\cdots$ O <sub>nitro</sub>  | -1293,4671870 | -3395092,673                |
|              | <i>ortho</i> -N-H $\cdots$ N <sub>amino</sub> | -1293,4611950 | -3395076,945                |
|              | <i>para</i> -N-H $\cdots$ N <sub>amino</sub>  | -1293,4648510 | -3395086,540                |
|              | C-F $\cdots$ $\pi$                            | -1293,4522250 | -3395053,400                |
| <b>D</b>     | D                                             | -547,4900608  | -1437051,912                |
|              | <i>ortho</i> -N-H $\cdots$ O <sub>nitro</sub> | -1094,9846199 | -2874115,630                |
|              | <i>para</i> -N-H $\cdots$ O <sub>nitro</sub>  | -1094,9884760 | -2874125,752                |
|              | <i>ortho</i> -N-H $\cdots$ N <sub>amino</sub> | -1094,9859252 | -2874119,056                |
|              | <i>para</i> -N-H $\cdots$ N <sub>amino</sub>  | -1094,9859445 | -2874119,107                |
|              | C-N <sub>amino</sub> $\cdots$ $\pi$           | -1094,9749154 | -2874090,158                |

<sup>a</sup> Intermolecular interaction energies  $\Delta E$  (Table 6) were calculated by subtracting the energy of the two molecules from the dimer energy.

**Table S5** ESP atomic charges for atoms of diaminonitrobenzenes in the gas phase ( $q$ , in units of elementary charge). The structure shows the atom numbering scheme. Level of theory: DFT/B3LYP/ M6-31G (TM)+\*.

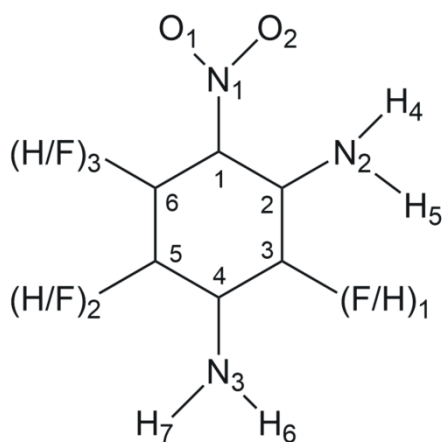

| code       | A      | B      | C      | D      |
|------------|--------|--------|--------|--------|
| $q(C_1)$   | -0,216 | -0,143 | -0,131 | -0,172 |
| $q(C_2)$   | 0,127  | 0,227  | 0,355  | 0,420  |
| $q(C_3)$   | 0,101  | 0,081  | -0,421 | -0,462 |
| $q(C_4)$   | 0,101  | 0,136  | 0,294  | 0,453  |
| $q(C_5)$   | 0,113  | 0,229  | 0,207  | -0,312 |
| $q(C_6)$   | 0,105  | -0,354 | -0,315 | -0,124 |
| $q(N_1)$   | 0,776  | 0,762  | 0,726  | 0,712  |
| $q(N_2)$   | -0,677 | -0,801 | -0,822 | -0,853 |
| $q(N_3)$   | -0,682 | -0,750 | -0,789 | -0,824 |
| $q(O_1)$   | -0,398 | -0,430 | -0,422 | -0,424 |
| $q(O_2)$   | -0,479 | -0,482 | -0,473 | -0,470 |
| $q(F/H_1)$ | -0,117 | -0,130 | 0,199  | 0,187  |
| $q(F/H_2)$ | -0,122 | -0,153 | -0,161 | 0,162  |
| $q(F/H_3)$ | -0,080 | 0,228  | 0,214  | 0,165  |
| $q(H_4)$   | 0,397  | 0,430  | 0,418  | 0,422  |
| $q(H_5)$   | 0,340  | 0,384  | 0,376  | 0,385  |
| $q(H_6)$   | 0,350  | 0,382  | 0,375  | 0,368  |
| $q(H_7)$   | 0,361  | 0,382  | 0,370  | 0,367  |
